# Supplementary material for: Fragmented Nuclear DNA Is the Predominant Genetic Material in Human Hair Shafts
Source: MDPI journal article supplement (doi:10.3390/genes9120640), 2018-12-18
Supplement: s1 [file s1]

## CLC Genomics Workbench Workflow for mtGenome

| Trim Sequences                         |                                              |
|----------------------------------------|----------------------------------------------|
| Trim adapter list                      | MiSeq Adapter Consensus 4_18_16-R_8BaseIndex |
| Use colorspace                         | false                                        |
| Also search on reversed sequence       | true                                         |
| Ambiguous trim                         | true                                         |
| Ambiguous limit                        | 2                                            |
| Quality limit                          | 0.05                                         |
| Quality trim                           | true                                         |
| Remove 5' terminal nucleotides         | false                                        |
| Number of 5' terminal nucleotides      | 1                                            |
| Remove 3' terminal nucleotides         | false                                        |
| Number of 3' terminal nucleotides      | 1                                            |
| Maximum number of nucleotides in reads | 1000000                                      |
| Minimum number of nucleotides in reads | 25                                           |
| Discard short reads                    | false                                        |
| Discard long reads                     | false                                        |

| Map Reads to Reference           |                 |
|----------------------------------|-----------------|
| References                       | NC_012920.1     |
| Masking mode                     | No masking      |
| Masking track                    |                 |
| Match score                      | 1               |
| Mismatch cost                    | 2               |
| Cost of insertions and deletions | Linear gap cost |
| Insertion cost                   | 3               |
| Deletion cost                    | 3               |
| Insertion open cost              | 6               |
| Insertion extend cost            | 1               |
| Deletion open cost               | 6               |
| Deletion extend cost             | 1               |
| Length fraction                  | 0.85            |
| Similarity fraction              | 0.97            |

| Map Reads to Reference       |              |
|------------------------------|--------------|
| Global alignment             | false        |
| Color space alignment        | true         |
| Color error cost             | 3            |
| Auto-detect paired distances | true         |
| Non-specific match handling  | Map randomly |

| Remove Duplicate Mapped Reads (Original name: Duplicate Mapped Reads Removal) |      |
|-------------------------------------------------------------------------------|------|
| Maximum representation of minority sequence (percent)                         | 20.0 |

| Create Detailed Mapping Report |       |
|--------------------------------|-------|
| Long contigs threshold         | 10000 |
| Short contigs threshold        | 200   |

| Fixed Ploidy Variant Detection       |        |
|--------------------------------------|--------|
| Ploidy                               | 2      |
| Required variant probability (%)     | 90.0   |
| Ignore positions with coverage above | 100000 |
| Minimum coverage                     | 5      |
| Minimum count                        | 2      |
| Minimum frequency (%)                | 10.0   |
| Restrict calling to target regions   |        |
| Ignore broken pairs                  | true   |
| Ignore non-specific matches          | No     |
| Minimum read length                  | 20     |
| Base quality filter                  | true   |
| Neighborhood radius                  | 5      |
| Minimum central quality              | 20     |
| Minimum neighborhood quality         | 15     |
| Read direction filter                | false  |
| Direction frequency (%)              | 5.0    |
| Relative read direction filter       | false  |
| Significance (%)                     | 1.0    |
| Read position filter                 | false  |
| Significance (%)                     | 1.0    |
| Remove pyro-error variants           | false  |

| Fixed Ploidy Variant Detection             |     |
|--------------------------------------------|-----|
| In homopolymer regions with minimum length | 3   |
| With frequency below                       | 0.8 |
